# Supplementary material for: Associations of Human Cognitive Abilities with Elevated Carbon Dioxide Concentrations in an Enclosed Chamber
Source: MDPI journal article supplement (doi:10.3390/atmos13060891), 2022-05-30
Supplement: s1 [file s1]

# Associations of Human Cognitive Abilities with Elevated Carbon Dioxide Concentrations in an Enclosed Chamber

Xiaodong Cao, Pei Li, Jie Zhang and Liping Pang

**Table S1.** GAMM results of the CO<sub>2</sub> effects on the cognitive test performance metrics.

| Cognitive Tests   | Performance Metrics (Unit)  | Fixed Effects ( <i>p</i> -Values)                       |                                                       |                                                          |
|-------------------|-----------------------------|---------------------------------------------------------|-------------------------------------------------------|----------------------------------------------------------|
|                   |                             | Medium CO <sub>2</sub> —Low CO <sub>2</sub> (Reference) | High CO <sub>2</sub> —Low CO <sub>2</sub> (Reference) | High CO <sub>2</sub> —Medium CO <sub>2</sub> (Reference) |
| Simple RT         | ACC <sub>sim</sub> (%)      | −0.48 (0.221)                                           | −0.16 (0.682)                                         | 0.32 (0.413)                                             |
|                   | CRT <sub>sim</sub> (ms)     | 7.04 (0.269)                                            | −3.18 (0.616)                                         | −10.22 (0.110)                                           |
| Discriminative RT | ACC <sub>dis</sub> (%)      | 0.48 (0.554)                                            | 1.43 (0.078)                                          | 0.95 (0.238)                                             |
|                   | CRT <sub>dis</sub> (ms)     | 14.43 (0.287)                                           | 0.39 (0.977)                                          | −14.03 (0.300)                                           |
| Choice RT         | ACC <sub>cho</sub> (%)      | 1.11 (0.276)                                            | 0.95 (0.350)                                          | −0.16 (0.876)                                            |
|                   | CRT <sub>cho</sub> (ms)     | 12.90 (0.258)                                           | 18.57 (0.105)                                         | 5.68 (0.617)                                             |
| Speed perception  | Deviation rate (%)          | −0.04 (0.920)                                           | −0.16 (0.661)                                         | −0.12 (0.735)                                            |
|                   | ACC <sub>total</sub> (%)    | −0.92 (0.110)                                           | −0.25 (0.660)                                         | 0.67 (0.243)                                             |
|                   | CRT <sub>total</sub> (ms)   | 60.49 (0.150)                                           | <b>115.43 ** (0.007)</b>                              | 54.94 (0.190)                                            |
| VS                | ACC <sub>report</sub> (%)   | −1.33 (0.233)                                           | −0.17 (0.881)                                         | 1.17 (0.296)                                             |
|                   | CRT <sub>report</sub> (ms)  | −34.79 (0.259)                                          | <b>77.99 * (0.013)</b>                                | <b>112.78 ** (&lt;0.001)</b>                             |
|                   | False alert rate (%)        | 0.50 (0.382)                                            | 0.33 (0.560)                                          | −0.17 (0.770)                                            |
|                   | Missing report rate (%)     | 1.33 (0.233)                                            | 0.17 (0.881)                                          | −1.17 (0.296)                                            |
| 2-back            | ACC (%)                     | 0.80 (0.161)                                            | −0.12 (0.828)                                         | −0.92 (0.106)                                            |
|                   | CRT (ms)                    | −11.33 (0.527)                                          | 11.95 (0.505)                                         | 23.28 (0.196)                                            |
| BART              | Average number of pumps     | 0.29 (0.769)                                            | 0.34 (0.725)                                          | 0.06 (0.955)                                             |
|                   | Critical response time (ms) | 8.63 (0.317)                                            | <b>18.17 * (0.037)</b>                                | 9.54 (0.269)                                             |
| Stroop            | Final response time (ms)    | 14.07 (0.614)                                           | 49.89 (0.077)                                         | 35.81 (0.202)                                            |
|                   | ACC <sub>total</sub> (%)    | 0.71 (0.218)                                            | 0.58 (0.309)                                          | −0.13 (0.827)                                            |
|                   | CRT <sub>total</sub> (ms)   | 1.90 (0.735)                                            | 6.48 (0.250)                                          | 4.58 (0.415)                                             |
|                   | ACC <sub>con</sub> (%)      | 0.25 (0.765)                                            | 0.83 (0.321)                                          | 0.58 (0.487)                                             |
|                   | CRT <sub>con</sub> (ms)     | 1.81 (0.767)                                            | <b>12.37 * (0.046)</b>                                | 10.57 (0.087)                                            |
|                   | ACC <sub>incon</sub> (%)    | 1.17 (0.139)                                            | 0.33 (0.671)                                          | −0.83 (0.289)                                            |
|                   | CRT <sub>incon</sub> (ms)   | 2.10 (0.716)                                            | 0.89 (0.878)                                          | −1.22 (0.833)                                            |

Bolded numbers indicate statistically significant differences; \* ( $p < 0.05$ ), \*\* ( $p < 0.01$ ).

**Table S2.** Values of the cognitive test performance metrics.

| Cognitive Tests   | Performance Metrics (Unit)  | Values                             |                                       |                                     |
|-------------------|-----------------------------|------------------------------------|---------------------------------------|-------------------------------------|
|                   |                             | Low CO <sub>2</sub><br>(Mean ± SD) | Medium CO <sub>2</sub><br>(Mean ± SD) | High CO <sub>2</sub><br>(Mean ± SD) |
| Simple RT         | $ACC_{sim}$ (%)             | 100.0 ± 0.0                        | 99.5 ± 2.6                            | 99.8 ± 0.9                          |
|                   | $CRT_{sim}$ (ms)            | 326.7 ± 36.6                       | 333.7 ± 56.0                          | 323.5 ± 35.9                        |
| Discriminative RT | $ACC_{dis}$ (%)             | 96.8 ± 5.1                         | 97.3 ± 3.9                            | 98.3 ± 3.2                          |
|                   | $CRT_{dis}$ (ms)            | 424.3 ± 66.9                       | 438.8 ± 74.0                          | 424.7 ± 72.3                        |
| Choice RT         | $ACC_{cho}$ (%)             | 94.9 ± 7.0                         | 96.0 ± 5.5                            | 95.9 ± 5.0                          |
|                   | $CRT_{cho}$ (ms)            | 491.5 ± 40.5                       | 504.4 ± 68.9                          | 510.1 ± 58.0                        |
| Speed perception  | Deviation rate (%)          | 12.13 ± 1.94                       | 12.10 ± 1.85                          | 11.97 ± 1.53                        |
|                   | $ACC_{total}$ (%)           | 98.2 ± 2.4                         | 97.3 ± 3.4                            | 97.9 ± 2.6                          |
|                   | $CRT_{total}$ (ms)          | 1629.5 ± 338.6                     | 1690.0 ± 233.5                        | 1744.9 ± 287.1                      |
| VS                | $ACC_{report}$ (%)          | 96.8 ± 4.8                         | 95.5 ± 5.5                            | 96.7 ± 5.3                          |
|                   | $CRT_{report}$ (ms)         | 1175.4 ± 230.2                     | 1140.7 ± 172.3                        | 1253.4 ± 213.1                      |
|                   | False alert rate (%)        | 0.5 ± 1.5                          | 1.0 ± 3.1                             | 0.8 ± 1.9                           |
| 2-back            | Missing report rate (%)     | 3.2 ± 4.8                          | 4.5 ± 5.5                             | 3.3 ± 5.3                           |
|                   | $ACC$ (%)                   | 97.2 ± 3.7                         | 98.0 ± 2.3                            | 97.1 ± 2.9                          |
|                   | $CRT$ (ms)                  | 663.1 ± 147.8                      | 651.8 ± 173.9                         | 675.0 ± 184.8                       |
| BART              | Average number of pumps     | 51.2 ± 5.7                         | 51.5 ± 7.0                            | 51.5 ± 4.9                          |
|                   | Critical response time (ms) | 278.5 ± 69.8                       | 287.2 ± 62.4                          | 296.7 ± 73.0                        |
|                   | Final response time (ms)    | 625.8 ± 221.9                      | 639.9 ± 235.6                         | 675.7 ± 244.4                       |
| Stroop            | $ACC_{total}$ (%)           | 96.4 ± 3.4                         | 97.1 ± 3.3                            | 97.0 ± 2.8                          |
|                   | $CRT_{total}$ (ms)          | 386.4 ± 27.2                       | 388.3 ± 31.9                          | 392.9 ± 39.2                        |
|                   | $ACC_{con}$ (%)             | 96.7 ± 3.6                         | 96.6 ± 4.2                            | 97.5 ± 3.0                          |
|                   | $CRT_{con}$ (ms)            | 383.3 ± 26.3                       | 385.1 ± 31.4                          | 395.6 ± 43.0                        |
|                   | $ACC_{incon}$ (%)           | 96.1 ± 3.9                         | 97.3 ± 4.0                            | 96.4 ± 4.0                          |
|                   | $CRT_{incon}$ (ms)          | 390.7 ± 29.5                       | 392.8 ± 33.8                          | 391.6 ± 37.7                        |
